# Supplementary material
Source: PubMed Central journal article supplement (PMC4809533)
Supplement: NIHMS771197-supplement-01.pdf [file NIHMS771197-supplement-01.pdf]

Figure S1

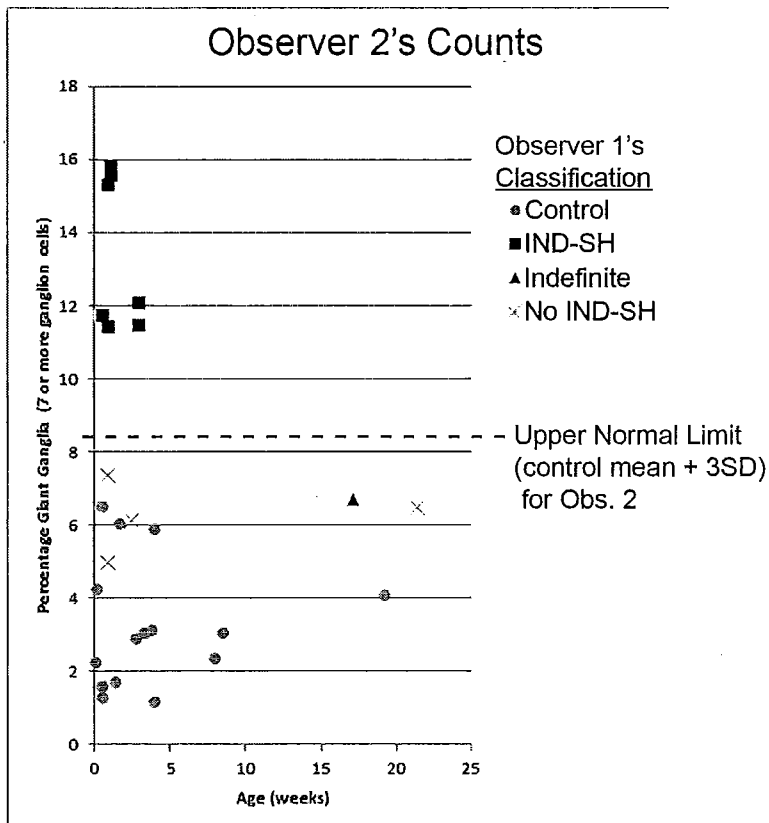

Supplemental Figure 1: Relative abundance of giant submucosal ganglia versus age as determined by Observer 2 for the controls and a subset of HSCR patients independently analyzed by Observer 1. The symbols indicate the groups defined by Observer 1 (see Figure 4). The dashed line indicates the upper normal limit (8.3%) for Observer 2, based on his control mean + 3SD. The same 7 patients were classified independently as IND-SH by both observers.

**Supplemental Table 1: Criteria used to count submucosal ganglion cells**

|                                                                                                                                                                                                                                                                                                                                                                                                                                                                                              |
|----------------------------------------------------------------------------------------------------------------------------------------------------------------------------------------------------------------------------------------------------------------------------------------------------------------------------------------------------------------------------------------------------------------------------------------------------------------------------------------------|
| 1. All areas counted should be situated within the submucosa                                                                                                                                                                                                                                                                                                                                                                                                                                 |
| 2. An area of dark brown perikaryal staining in a cell that contains a nucleus (a nucleus must be counterstained blue with or without superimposed brown immunoreactivity and have sharp contours; a lucent area or semicircular outline is not sufficient) <ul style="list-style-type: none"><li>- Granular stain must cover the nucleus OR encircle at least 50% of circumference of the nucleus</li><li>- AND at least some cytoplasmic granular brown staining must be present</li></ul> |
| 3. Overlapping or continuous areas of dark brown staining, in the presence of 2 distinct nuclei and cell membranes, should be counted as 2 cell bodies                                                                                                                                                                                                                                                                                                                                       |
| 4. If there is any ambiguity about the presence of a nucleus, the cell should not be included                                                                                                                                                                                                                                                                                                                                                                                                |

**Supplemental Table 2: Intra-observer variability**

|       | Full-circumference total submucosal ganglion cell count* |                    |                     |                    | Relative Percent Difference (100*difference/mean) |                    |
|-------|----------------------------------------------------------|--------------------|---------------------|--------------------|---------------------------------------------------|--------------------|
|       | A                                                        | B                  | C                   | D                  | Intra-obs 1                                       | Intra-obs 2        |
| Slide | Observer 1 Count 1                                       | Observer 1 Count 2 | Observer 2, Count 1 | Observer 2 Count 2 | (A v B)                                           | (C v D)            |
| A     | 434                                                      | 451                | 514                 | 438                | 3.84                                              | 15.97              |
| B     | 435                                                      | 436                | 415                 | 413                | 0.23                                              | 0.48               |
| C     | 471                                                      | 402                | 519                 | 488                | 15.81                                             | 6.16               |
| D     | 326                                                      | 271                | 429                 | 376                | 18.43                                             | 13.17              |
| E     | 480                                                      | 436                | 559                 | 539                | 9.61                                              | 3.64               |
|       |                                                          |                    |                     | <b>Mean +/- SE</b> | <b>9.58 ± 3.45</b>                                | <b>7.88 ± 2.91</b> |

\*For each observer, counts 1 and 2 were separated by more than 300 days. Abbreviations: obs, observer; SE, standard error of the mean.

**Supplemental Table 3: Inter-observer variability**

| Slide            | Full-circumference total submucosal ganglion cell count* |              |       | Difference (B - A) | RPD A v B    |
|------------------|----------------------------------------------------------|--------------|-------|--------------------|--------------|
|                  | Observer 1 A                                             | Observer 2 B | Mean  |                    |              |
| <b>Control 1</b> | 261                                                      | 311          | 286   | 50                 | 16.08        |
| <b>2</b>         | 488                                                      | 542          | 515   | 54                 | 9.96         |
| <b>3</b>         | 246                                                      | 335          | 290.5 | 89                 | 26.57        |
| <b>4</b>         | 337                                                      | 408          | 372.5 | 71                 | 17.40        |
| <b>5</b>         | 435                                                      | 413          | 424   | -22                | 5.33         |
| <b>6</b>         | 419                                                      | 512          | 465.5 | 93                 | 18.16        |
| <b>7</b>         | 434                                                      | 438          | 436   | 4                  | 0.91         |
| <b>8</b>         | 326                                                      | 376          | 351   | 50                 | 13.30        |
| <b>9</b>         | 289                                                      | 368          | 328.5 | 79                 | 21.47        |
| <b>13</b>        | 207                                                      | 432          | 319.5 | 225                | 52.08        |
| <b>16</b>        | 423                                                      | 768          | 595.5 | 345                | 44.92        |
| <b>18</b>        | 132                                                      | 474          | 303   | 342                | 72.15        |
| <b>22</b>        | 56                                                       | 199          | 127.5 | 143                | 71.86        |
| <b>23</b>        | 205                                                      | 419          | 312   | 214                | 51.07        |
| <b>24</b>        | 148                                                      | 287          | 217.5 | 139                | 48.43        |
| <b>HSCR 1</b>    | 764                                                      | 868          | 816   | 104                | 11.98        |
| <b>HSCR 4</b>    | 796                                                      | 1053         | 924.5 | 257                | 24.41        |
| <b>HSCR 10</b>   | 329                                                      | 545          | 437   | 216                | 39.63        |
| <b>HSCR 12</b>   | 608                                                      | 584          | 596   | -24                | -4.11        |
| <b>HSCR 18</b>   | 403                                                      | 462          | 432.5 | 59                 | 12.77        |
| <b>HSCR 23</b>   | 480                                                      | 539          | 509.5 | 59                 | 10.95        |
| <b>HSCR 28</b>   | 489                                                      | 616          | 552.5 | 127                | 20.62        |
| <b>HSCR 31</b>   | 599                                                      | 939          | 769   | 340                | 36.21        |
| <b>HSCR 33</b>   | 1105                                                     | 1275         | 1190  | 170                | 13.33        |
| <b>HSCR 35</b>   | 612                                                      | 1106         | 859   | 494                | 44.67        |
| <b>HSCR 36</b>   | 471                                                      | 488          | 479.5 | 17                 | 3.48         |
| <b>HSCR 37</b>   | 512                                                      | 574          | 543   | 62                 | 10.80        |
| <b>HSCR 38</b>   | 312                                                      | 634          | 473   | 322                | 50.79        |
| <b>HSCR 42</b>   | 578                                                      | 801          | 689.5 | 223                | 27.84        |
| <b>Mean</b>      |                                                          |              |       |                    | <b>26.66</b> |
| <b>SE</b>        |                                                          |              |       |                    | <b>3.81</b>  |

Abbreviations: RPD, relative percentage difference (100 \* difference/mean); SE, standard error of the mean
